# Supplementary material for: Identification and Functional Analysis of microRNAs Involved in the Anther Development in Cotton Genic Male Sterile Line Yu98-8A
Source: MDPI journal article supplement (doi:10.3390/ijms17101677), 2016-10-07
Supplement: s1 [file s1]

# Supplementary Materials: Identification and Functional Analysis of microRNAs Involved in the Anther Development in Cotton Genic Male Sterile Line Yu98-8A

Xiaojie Yang, Yuanming Zhao, Deyi Xie, Yao Sun, Xunlu Zhu, Nardana Esmaili, Zuoren Yang, Ye Wang, Guo Yin, Shuping Lv, Lihong Nie, Zhongjie Tang, Fu'an Zhao, Wu Li, Neelam Mishra, Li Sun, Wei Zhu and Weiping Fang

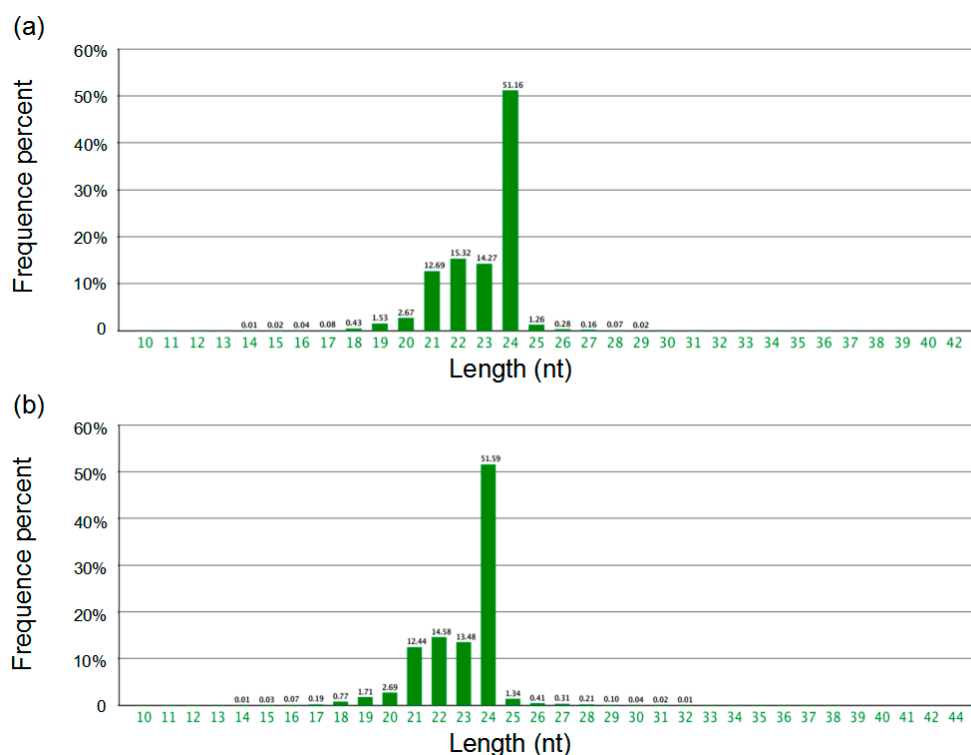

Figure S1. Length distribution of small RNAs.

Table S1. Summary of sequencing data from two individual libraries.

| Type              | Library of MS Buds |             | Library of MF Buds |             |
|-------------------|--------------------|-------------|--------------------|-------------|
|                   | Count              | Percent (%) | Count              | Percent (%) |
| Total reads       | 11,095,604         | —           | 10,741,527         | —           |
| High_quality      | 11,044,443         | 100.00      | 10,688,607         | 100.00      |
| 3' adapter_null   | 2073               | 0.02        | 2869               | 0.03        |
| Insert_null       | 312                | 0.00        | 341                | 0.00        |
| 5' adapter_null   | 6529               | 0.06        | 5927               | 0.06        |
| Shorter_than_18nt | 32,275             | 0.29        | 14,930             | 0.14        |
| PolyA             | 972                | 0.01        | 881                | 0.01        |
| Clean_reads       | 11,002,282         | 99.62       | 10,663,659         | 99.77       |

**Table S2.** Statistics of conserved miRNAs from two individual libraries.

| Type              | No. of miRNA | No. of miRNA-5p | No. of miRNA-3p | No. of Hairpin |
|-------------------|--------------|-----------------|-----------------|----------------|
| No. of miRBase 19 | 4412         | 766             | 762             | 5127           |
| No. of identified | MS           | 1588            | 206             | 165            |
|                   | MF           | 1536            | 205             | 167            |
|                   |              |                 |                 | 1897           |
|                   |              |                 |                 | 1842           |

**Table S6.** Targets of differentially expressed known and novel miRNAs predicted by informatics.

| miRNA         | Targets |                                                                                                                                                                                                                                                                                                                                                                                                                                                                                                                                                                                                                                                                                                                                                                                                                                                                                                                                                                                                                                                                                                                                                                                                                                                                                                                        |
|---------------|---------|------------------------------------------------------------------------------------------------------------------------------------------------------------------------------------------------------------------------------------------------------------------------------------------------------------------------------------------------------------------------------------------------------------------------------------------------------------------------------------------------------------------------------------------------------------------------------------------------------------------------------------------------------------------------------------------------------------------------------------------------------------------------------------------------------------------------------------------------------------------------------------------------------------------------------------------------------------------------------------------------------------------------------------------------------------------------------------------------------------------------------------------------------------------------------------------------------------------------------------------------------------------------------------------------------------------------|
|               | Number  | Gene ID                                                                                                                                                                                                                                                                                                                                                                                                                                                                                                                                                                                                                                                                                                                                                                                                                                                                                                                                                                                                                                                                                                                                                                                                                                                                                                                |
| miR160a       | 8       | Cotton_D_gene_10032280, Cotton_D_gene_10025306, Cotton_D_gene_10019554, Cotton_D_gene_10010678, Cotton_D_gene_10008456, Cotton_D_gene_10005922, Cotton_D_gene_10006397, Cotton_D_gene_10002224                                                                                                                                                                                                                                                                                                                                                                                                                                                                                                                                                                                                                                                                                                                                                                                                                                                                                                                                                                                                                                                                                                                         |
| miR2111a      | 1       | Cotton_D_gene_10019350                                                                                                                                                                                                                                                                                                                                                                                                                                                                                                                                                                                                                                                                                                                                                                                                                                                                                                                                                                                                                                                                                                                                                                                                                                                                                                 |
| miR2118a-3p   | 8       | Cotton_D_gene_10011549, Cotton_D_gene_10015239, Cotton_D_gene_10003169, Cotton_D_gene_10012641, Cotton_D_gene_10012642, Cotton_D_gene_10012644, Cotton_D_gene_10001596, Cotton_D_gene_10002457                                                                                                                                                                                                                                                                                                                                                                                                                                                                                                                                                                                                                                                                                                                                                                                                                                                                                                                                                                                                                                                                                                                         |
| miR2911       | 1       | Cotton_D_gene_10037642                                                                                                                                                                                                                                                                                                                                                                                                                                                                                                                                                                                                                                                                                                                                                                                                                                                                                                                                                                                                                                                                                                                                                                                                                                                                                                 |
| miR319        | 1       | Cotton_D_gene_10015208                                                                                                                                                                                                                                                                                                                                                                                                                                                                                                                                                                                                                                                                                                                                                                                                                                                                                                                                                                                                                                                                                                                                                                                                                                                                                                 |
| miR394a       | 2       | Cotton_D_gene_10024254, Cotton_D_gene_10011419                                                                                                                                                                                                                                                                                                                                                                                                                                                                                                                                                                                                                                                                                                                                                                                                                                                                                                                                                                                                                                                                                                                                                                                                                                                                         |
| miR397a       | 20      | Cotton_D_gene_10032147, Cotton_D_gene_10024560, Cotton_D_gene_10024579, Cotton_D_gene_10025270, Cotton_D_gene_10034883, Cotton_D_gene_10033270, Cotton_D_gene_10029334, Cotton_D_gene_10029336, Cotton_D_gene_10036799, Cotton_D_gene_10034274, Cotton_D_gene_10034277, Cotton_D_gene_10034278, Cotton_D_gene_10034326, Cotton_D_gene_10010424, Cotton_D_gene_10024113, Cotton_D_gene_10021697, Cotton_D_gene_10004240, Cotton_D_gene_100042422, Cotton_D_gene_10004255, Cotton_D_gene_10009260                                                                                                                                                                                                                                                                                                                                                                                                                                                                                                                                                                                                                                                                                                                                                                                                                        |
| miR473        | 2       | Cotton_D_gene_10021396, Cotton_D_gene_10021796                                                                                                                                                                                                                                                                                                                                                                                                                                                                                                                                                                                                                                                                                                                                                                                                                                                                                                                                                                                                                                                                                                                                                                                                                                                                         |
| miR5224a      | 1       | Cotton_D_gene_10013047                                                                                                                                                                                                                                                                                                                                                                                                                                                                                                                                                                                                                                                                                                                                                                                                                                                                                                                                                                                                                                                                                                                                                                                                                                                                                                 |
| miR5338       | 2       | Cotton_D_gene_10025591, Cotton_D_gene_10025592                                                                                                                                                                                                                                                                                                                                                                                                                                                                                                                                                                                                                                                                                                                                                                                                                                                                                                                                                                                                                                                                                                                                                                                                                                                                         |
| miR5658       | 53      | Cotton_D_gene_10030644, Cotton_D_gene_10030730, Cotton_D_gene_10032182, Cotton_D_gene_10032194, Cotton_D_gene_10024719, Cotton_D_gene_10025777, Cotton_D_gene_10033147, Cotton_D_gene_10040494, Cotton_D_gene_10025206, Cotton_D_gene_10028544, Cotton_D_gene_10027756, Cotton_D_gene_10037721, Cotton_D_gene_10015441, Cotton_D_gene_10028340, Cotton_D_gene_10029792, Cotton_D_gene_10029828, Cotton_D_gene_10031210, Cotton_D_gene_10028210, Cotton_D_gene_10013894, Cotton_D_gene_10013990, Cotton_D_gene_10012955, Cotton_D_gene_10030124, Cotton_D_gene_10012266, Cotton_D_gene_10012379, Cotton_D_gene_10027686, Cotton_D_gene_10018858, Cotton_D_gene_10016981, Cotton_D_gene_10034540, Cotton_D_gene_10025541, Cotton_D_gene_10010232, Cotton_D_gene_10012128, Cotton_D_gene_10037240, Cotton_D_gene_10037435, Cotton_D_gene_10009431, Cotton_D_gene_10017165, Cotton_D_gene_10015913, Cotton_D_gene_10015920, Cotton_D_gene_10009137, Cotton_D_gene_10006267, Cotton_D_gene_10013688, Cotton_D_gene_10004867, Cotton_D_gene_10008830, Cotton_D_gene_10008830, Cotton_D_gene_10009653, Cotton_D_gene_10011608, Cotton_D_gene_10017453, Cotton_D_gene_10004743, Cotton_D_gene_10008407, Cotton_D_gene_10003171, Cotton_D_gene_10012070, Cotton_D_gene_10002589, Cotton_D_gene_10000877, Cotton_D_gene_10000377 |
| miR5825       | 1       | Cotton_D_gene_10024045                                                                                                                                                                                                                                                                                                                                                                                                                                                                                                                                                                                                                                                                                                                                                                                                                                                                                                                                                                                                                                                                                                                                                                                                                                                                                                 |
| miR6247       | 1       | Cotton_D_gene_10034386                                                                                                                                                                                                                                                                                                                                                                                                                                                                                                                                                                                                                                                                                                                                                                                                                                                                                                                                                                                                                                                                                                                                                                                                                                                                                                 |
| novel_mir_104 | 3       | Cotton_D_gene_10006847, Cotton_D_gene_10003369, Cotton_D_gene_10020936                                                                                                                                                                                                                                                                                                                                                                                                                                                                                                                                                                                                                                                                                                                                                                                                                                                                                                                                                                                                                                                                                                                                                                                                                                                 |
| novel_mir_137 | 2       | Cotton_D_gene_10036714, Cotton_D_gene_10016627                                                                                                                                                                                                                                                                                                                                                                                                                                                                                                                                                                                                                                                                                                                                                                                                                                                                                                                                                                                                                                                                                                                                                                                                                                                                         |
| novel_mir_165 | 2       | Cotton_D_gene_10035777, Cotton_D_gene_10001001                                                                                                                                                                                                                                                                                                                                                                                                                                                                                                                                                                                                                                                                                                                                                                                                                                                                                                                                                                                                                                                                                                                                                                                                                                                                         |
| novel_mir_168 | 1       | Cotton_D_gene_10024580                                                                                                                                                                                                                                                                                                                                                                                                                                                                                                                                                                                                                                                                                                                                                                                                                                                                                                                                                                                                                                                                                                                                                                                                                                                                                                 |
| novel_mir_20  | 1       | Cotton_D_gene_10035647                                                                                                                                                                                                                                                                                                                                                                                                                                                                                                                                                                                                                                                                                                                                                                                                                                                                                                                                                                                                                                                                                                                                                                                                                                                                                                 |
| novel_mir_204 | 1       | Cotton_D_gene_10034932                                                                                                                                                                                                                                                                                                                                                                                                                                                                                                                                                                                                                                                                                                                                                                                                                                                                                                                                                                                                                                                                                                                                                                                                                                                                                                 |
| novel_mir_206 | 1       | Cotton_D_gene_10014577                                                                                                                                                                                                                                                                                                                                                                                                                                                                                                                                                                                                                                                                                                                                                                                                                                                                                                                                                                                                                                                                                                                                                                                                                                                                                                 |

Table S6. Cont.

| miRNA         | Targets |                                                                                                                                                                                                                                                                                                                                                                                                                                                                                                                                                                                                                                                                                                                                                                                                                                                                                                                                                                                                                                                                                                                                                                                                                                                                                                                                                                                                                                                                                                                                                                                                                                                                                                                                                                                                                                                                                                                                                                                                                                                                                                                                                                                                                                                                                                                                                                                                                                                                                                                                                                                                                                                                                                                        |
|---------------|---------|------------------------------------------------------------------------------------------------------------------------------------------------------------------------------------------------------------------------------------------------------------------------------------------------------------------------------------------------------------------------------------------------------------------------------------------------------------------------------------------------------------------------------------------------------------------------------------------------------------------------------------------------------------------------------------------------------------------------------------------------------------------------------------------------------------------------------------------------------------------------------------------------------------------------------------------------------------------------------------------------------------------------------------------------------------------------------------------------------------------------------------------------------------------------------------------------------------------------------------------------------------------------------------------------------------------------------------------------------------------------------------------------------------------------------------------------------------------------------------------------------------------------------------------------------------------------------------------------------------------------------------------------------------------------------------------------------------------------------------------------------------------------------------------------------------------------------------------------------------------------------------------------------------------------------------------------------------------------------------------------------------------------------------------------------------------------------------------------------------------------------------------------------------------------------------------------------------------------------------------------------------------------------------------------------------------------------------------------------------------------------------------------------------------------------------------------------------------------------------------------------------------------------------------------------------------------------------------------------------------------------------------------------------------------------------------------------------------------|
|               | Number  | Gene ID                                                                                                                                                                                                                                                                                                                                                                                                                                                                                                                                                                                                                                                                                                                                                                                                                                                                                                                                                                                                                                                                                                                                                                                                                                                                                                                                                                                                                                                                                                                                                                                                                                                                                                                                                                                                                                                                                                                                                                                                                                                                                                                                                                                                                                                                                                                                                                                                                                                                                                                                                                                                                                                                                                                |
| novel_mir_22  | 13      | Cotton_D_gene_10040158, Cotton_D_gene_10034716, Cotton_D_gene_10018762, Cotton_D_gene_10028326, Cotton_D_gene_10028249, Cotton_D_gene_10036613, Cotton_D_gene_10020700, Cotton_D_gene_10019674, Cotton_D_gene_10019674, Cotton_D_gene_10021118, Cotton_D_gene_10006199, Cotton_D_gene_10013041, Cotton_D_gene_10010354                                                                                                                                                                                                                                                                                                                                                                                                                                                                                                                                                                                                                                                                                                                                                                                                                                                                                                                                                                                                                                                                                                                                                                                                                                                                                                                                                                                                                                                                                                                                                                                                                                                                                                                                                                                                                                                                                                                                                                                                                                                                                                                                                                                                                                                                                                                                                                                                 |
| novel_mir_229 | 1       | Cotton_D_gene_10011581                                                                                                                                                                                                                                                                                                                                                                                                                                                                                                                                                                                                                                                                                                                                                                                                                                                                                                                                                                                                                                                                                                                                                                                                                                                                                                                                                                                                                                                                                                                                                                                                                                                                                                                                                                                                                                                                                                                                                                                                                                                                                                                                                                                                                                                                                                                                                                                                                                                                                                                                                                                                                                                                                                 |
| novel_mir_23  | 109     | Cotton_D_gene_10040129, Cotton_D_gene_10032171, Cotton_D_gene_10029877, Cotton_D_gene_10034713, Cotton_D_gene_10040827, Cotton_D_gene_10033566, Cotton_D_gene_10024628, Cotton_D_gene_10035245, Cotton_D_gene_10035277, Cotton_D_gene_10035417, Cotton_D_gene_10036178, Cotton_D_gene_10022905, Cotton_D_gene_10022967, Cotton_D_gene_10023060, Cotton_D_gene_10039648, Cotton_D_gene_10026515, Cotton_D_gene_10038967, Cotton_D_gene_10028050, Cotton_D_gene_10038536, Cotton_D_gene_10019695, Cotton_D_gene_10036227, Cotton_D_gene_10036307, Cotton_D_gene_10035007, Cotton_D_gene_10035041, Cotton_D_gene_10027927, Cotton_D_gene_10039707, Cotton_D_gene_10039717, Cotton_D_gene_10039839, Cotton_D_gene_10039851, Cotton_D_gene_10015463, Cotton_D_gene_10038426, Cotton_D_gene_10023706, Cotton_D_gene_10029656, Cotton_D_gene_10026941, Cotton_D_gene_10022078, Cotton_D_gene_10022107, Cotton_D_gene_10027131, Cotton_D_gene_10027231, Cotton_D_gene_10014337, Cotton_D_gene_10014622, Cotton_D_gene_10014664, Cotton_D_gene_10034832, Cotton_D_gene_10028276, Cotton_D_gene_10015648, Cotton_D_gene_10014081, Cotton_D_gene_10025649, Cotton_D_gene_10025697, Cotton_D_gene_10023925, Cotton_D_gene_10016539, Cotton_D_gene_10016543, Cotton_D_gene_10033257, Cotton_D_gene_10036714, Cotton_D_gene_10018882, Cotton_D_gene_10020810, Cotton_D_gene_10023437, Cotton_D_gene_10034402, Cotton_D_gene_10034442, Cotton_D_gene_10034491, Cotton_D_gene_10036442, Cotton_D_gene_10037481, Cotton_D_gene_10024015, Cotton_D_gene_10028955, Cotton_D_gene_10014876, Cotton_D_gene_10027249, Cotton_D_gene_10021781, Cotton_D_gene_10015934, Cotton_D_gene_10010765, Cotton_D_gene_10026366, Cotton_D_gene_10026059, Cotton_D_gene_10019553, Cotton_D_gene_10019572, Cotton_D_gene_10008774, Cotton_D_gene_10008282, Cotton_D_gene_10010670, Cotton_D_gene_10006258, Cotton_D_gene_10007195, Cotton_D_gene_10013740, Cotton_D_gene_10011451, Cotton_D_gene_10005104, Cotton_D_gene_10024309, Cotton_D_gene_10024483, Cotton_D_gene_10024485, Cotton_D_gene_10008894, Cotton_D_gene_10027070, Cotton_D_gene_10006537, Cotton_D_gene_10004797, Cotton_D_gene_10011063, Cotton_D_gene_10005095, Cotton_D_gene_10010752, Cotton_D_gene_10015702, Cotton_D_gene_10013027, Cotton_D_gene_10006381, Cotton_D_gene_10004377, Cotton_D_gene_10006431, Cotton_D_gene_10014130, Cotton_D_gene_10010301, Cotton_D_gene_10010323, Cotton_D_gene_10004130, Cotton_D_gene_10003881, Cotton_D_gene_10002338, Cotton_D_gene_10006202, Cotton_D_gene_10004652, Cotton_D_gene_10002911, Cotton_D_gene_10003495, Cotton_D_gene_10001342, Cotton_D_gene_10001247, Cotton_D_gene_10002984, Cotton_D_gene_10001974, Cotton_D_gene_10000516 |

Table S6. Cont.

| miRNA         | Targets |                                                                                                                                                                                                                                                                                                                                                                                                                                                                                                                                                                                                                                                                                                                                                                                                                                                                                                                                                                                                                                                                                                                                                                                                                                                                                                                                                                                                                                                                                                                                                                                                                                                                                                                                                                                                                                                                                                                                                                                                                                                                                                                                                                                                                                                                                                                                                                                                                                                                                                                                                                                                                                                                                                                                                                                                |
|---------------|---------|------------------------------------------------------------------------------------------------------------------------------------------------------------------------------------------------------------------------------------------------------------------------------------------------------------------------------------------------------------------------------------------------------------------------------------------------------------------------------------------------------------------------------------------------------------------------------------------------------------------------------------------------------------------------------------------------------------------------------------------------------------------------------------------------------------------------------------------------------------------------------------------------------------------------------------------------------------------------------------------------------------------------------------------------------------------------------------------------------------------------------------------------------------------------------------------------------------------------------------------------------------------------------------------------------------------------------------------------------------------------------------------------------------------------------------------------------------------------------------------------------------------------------------------------------------------------------------------------------------------------------------------------------------------------------------------------------------------------------------------------------------------------------------------------------------------------------------------------------------------------------------------------------------------------------------------------------------------------------------------------------------------------------------------------------------------------------------------------------------------------------------------------------------------------------------------------------------------------------------------------------------------------------------------------------------------------------------------------------------------------------------------------------------------------------------------------------------------------------------------------------------------------------------------------------------------------------------------------------------------------------------------------------------------------------------------------------------------------------------------------------------------------------------------------|
|               | Number  | Gene ID                                                                                                                                                                                                                                                                                                                                                                                                                                                                                                                                                                                                                                                                                                                                                                                                                                                                                                                                                                                                                                                                                                                                                                                                                                                                                                                                                                                                                                                                                                                                                                                                                                                                                                                                                                                                                                                                                                                                                                                                                                                                                                                                                                                                                                                                                                                                                                                                                                                                                                                                                                                                                                                                                                                                                                                        |
| novel_mir_265 | 112     | Cotton_D_gene_10040068, Cotton_D_gene_10040103, Cotton_D_gene_10038593, Cotton_D_gene_10038598, Cotton_D_gene_10032522, Cotton_D_gene_10034237, Cotton_D_gene_10031989, Cotton_D_gene_10030975, Cotton_D_gene_10029885, Cotton_D_gene_10040808, Cotton_D_gene_10025019, Cotton_D_gene_10039279, Cotton_D_gene_10039375, Cotton_D_gene_10035228, Cotton_D_gene_10023322, Cotton_D_gene_10036135, Cotton_D_gene_10036150, Cotton_D_gene_10025954, Cotton_D_gene_10022902, Cotton_D_gene_10022916, Cotton_D_gene_10039579, Cotton_D_gene_10039034, Cotton_D_gene_10039228, Cotton_D_gene_10028059, Cotton_D_gene_10038949, Cotton_D_gene_10028723, Cotton_D_gene_10028745, Cotton_D_gene_10018238, Cotton_D_gene_10027799, Cotton_D_gene_10036234, Cotton_D_gene_10036906, Cotton_D_gene_10039994, Cotton_D_gene_10028374, Cotton_D_gene_10029057, Cotton_D_gene_10018516, Cotton_D_gene_10027174, Cotton_D_gene_10032484, Cotton_D_gene_10014631, Cotton_D_gene_10026671, Cotton_D_gene_10024224, Cotton_D_gene_10028223, Cotton_D_gene_10031618, Cotton_D_gene_10018624, Cotton_D_gene_10022651, Cotton_D_gene_10025667, Cotton_D_gene_10025671, Cotton_D_gene_10030045, Cotton_D_gene_10030151, Cotton_D_gene_10030155, Cotton_D_gene_10030168, Cotton_D_gene_10016547, Cotton_D_gene_10027631, Cotton_D_gene_10029463, Cotton_D_gene_10029500, Cotton_D_gene_10022547, Cotton_D_gene_10014388, Cotton_D_gene_10014984, Cotton_D_gene_10036433, Cotton_D_gene_10012163, Cotton_D_gene_10023836, Cotton_D_gene_10014246, Cotton_D_gene_10026232, Cotton_D_gene_10020591, Cotton_D_gene_10027255, Cotton_D_gene_10017644, Cotton_D_gene_10015894, Cotton_D_gene_10015967, Cotton_D_gene_10017709, Cotton_D_gene_10013332, Cotton_D_gene_10010791, Cotton_D_gene_10026326, Cotton_D_gene_10019565, Cotton_D_gene_10019671, Cotton_D_gene_10014452, Cotton_D_gene_10009731, Cotton_D_gene_10010653, Cotton_D_gene_10022158, Cotton_D_gene_10008693, Cotton_D_gene_10007237, Cotton_D_gene_10014793, Cotton_D_gene_10009911, Cotton_D_gene_10024256, Cotton_D_gene_10024260, Cotton_D_gene_10024334, Cotton_D_gene_10006467, Cotton_D_gene_10005490, Cotton_D_gene_10027017, Cotton_D_gene_10011070, Cotton_D_gene_10007253, Cotton_D_gene_10004512, Cotton_D_gene_10007516, Cotton_D_gene_10017424, Cotton_D_gene_10015710, Cotton_D_gene_10003386, Cotton_D_gene_10014150, Cotton_D_gene_10020994, Cotton_D_gene_10003585, Cotton_D_gene_10012054, Cotton_D_gene_10003460, Cotton_D_gene_10008234, Cotton_D_gene_10003065, Cotton_D_gene_10010271, Cotton_D_gene_10002056, Cotton_D_gene_10001890, Cotton_D_gene_10001787, Cotton_D_gene_10001634, Cotton_D_gene_10001041, Cotton_D_gene_10001000, Cotton_D_gene_10002545, Cotton_D_gene_10000403, Cotton_D_gene_10000672, Cotton_D_gene_10000154 |
|               |         | Cotton_D_gene_10036714, Cotton_D_gene_10016627                                                                                                                                                                                                                                                                                                                                                                                                                                                                                                                                                                                                                                                                                                                                                                                                                                                                                                                                                                                                                                                                                                                                                                                                                                                                                                                                                                                                                                                                                                                                                                                                                                                                                                                                                                                                                                                                                                                                                                                                                                                                                                                                                                                                                                                                                                                                                                                                                                                                                                                                                                                                                                                                                                                                                 |
|               |         | Cotton_D_gene_10011395, Cotton_D_gene_10012990, Cotton_D_gene_10000913                                                                                                                                                                                                                                                                                                                                                                                                                                                                                                                                                                                                                                                                                                                                                                                                                                                                                                                                                                                                                                                                                                                                                                                                                                                                                                                                                                                                                                                                                                                                                                                                                                                                                                                                                                                                                                                                                                                                                                                                                                                                                                                                                                                                                                                                                                                                                                                                                                                                                                                                                                                                                                                                                                                         |
|               |         | Cotton_D_gene_10032704, Cotton_D_gene_10016308, Cotton_D_gene_10039873                                                                                                                                                                                                                                                                                                                                                                                                                                                                                                                                                                                                                                                                                                                                                                                                                                                                                                                                                                                                                                                                                                                                                                                                                                                                                                                                                                                                                                                                                                                                                                                                                                                                                                                                                                                                                                                                                                                                                                                                                                                                                                                                                                                                                                                                                                                                                                                                                                                                                                                                                                                                                                                                                                                         |
|               |         | Cotton_D_gene_10036216                                                                                                                                                                                                                                                                                                                                                                                                                                                                                                                                                                                                                                                                                                                                                                                                                                                                                                                                                                                                                                                                                                                                                                                                                                                                                                                                                                                                                                                                                                                                                                                                                                                                                                                                                                                                                                                                                                                                                                                                                                                                                                                                                                                                                                                                                                                                                                                                                                                                                                                                                                                                                                                                                                                                                                         |
|               |         | Cotton_D_gene_10034825, Cotton_D_gene_10032791, Cotton_D_gene_10019765, Cotton_D_gene_10035011, Cotton_D_gene_10026261                                                                                                                                                                                                                                                                                                                                                                                                                                                                                                                                                                                                                                                                                                                                                                                                                                                                                                                                                                                                                                                                                                                                                                                                                                                                                                                                                                                                                                                                                                                                                                                                                                                                                                                                                                                                                                                                                                                                                                                                                                                                                                                                                                                                                                                                                                                                                                                                                                                                                                                                                                                                                                                                         |
|               |         | Cotton_D_gene_10032704, Cotton_D_gene_10039873, Cotton_D_gene_10013879                                                                                                                                                                                                                                                                                                                                                                                                                                                                                                                                                                                                                                                                                                                                                                                                                                                                                                                                                                                                                                                                                                                                                                                                                                                                                                                                                                                                                                                                                                                                                                                                                                                                                                                                                                                                                                                                                                                                                                                                                                                                                                                                                                                                                                                                                                                                                                                                                                                                                                                                                                                                                                                                                                                         |
|               |         | Cotton_D_gene_10032903                                                                                                                                                                                                                                                                                                                                                                                                                                                                                                                                                                                                                                                                                                                                                                                                                                                                                                                                                                                                                                                                                                                                                                                                                                                                                                                                                                                                                                                                                                                                                                                                                                                                                                                                                                                                                                                                                                                                                                                                                                                                                                                                                                                                                                                                                                                                                                                                                                                                                                                                                                                                                                                                                                                                                                         |
|               |         | Cotton_D_gene_10033088                                                                                                                                                                                                                                                                                                                                                                                                                                                                                                                                                                                                                                                                                                                                                                                                                                                                                                                                                                                                                                                                                                                                                                                                                                                                                                                                                                                                                                                                                                                                                                                                                                                                                                                                                                                                                                                                                                                                                                                                                                                                                                                                                                                                                                                                                                                                                                                                                                                                                                                                                                                                                                                                                                                                                                         |
|               |         | Cotton_D_gene_10022875, Cotton_D_gene_10013994                                                                                                                                                                                                                                                                                                                                                                                                                                                                                                                                                                                                                                                                                                                                                                                                                                                                                                                                                                                                                                                                                                                                                                                                                                                                                                                                                                                                                                                                                                                                                                                                                                                                                                                                                                                                                                                                                                                                                                                                                                                                                                                                                                                                                                                                                                                                                                                                                                                                                                                                                                                                                                                                                                                                                 |
|               |         | Cotton_D_gene_10022694, Cotton_D_gene_10022695                                                                                                                                                                                                                                                                                                                                                                                                                                                                                                                                                                                                                                                                                                                                                                                                                                                                                                                                                                                                                                                                                                                                                                                                                                                                                                                                                                                                                                                                                                                                                                                                                                                                                                                                                                                                                                                                                                                                                                                                                                                                                                                                                                                                                                                                                                                                                                                                                                                                                                                                                                                                                                                                                                                                                 |
|               |         | Cotton_D_gene_10033485                                                                                                                                                                                                                                                                                                                                                                                                                                                                                                                                                                                                                                                                                                                                                                                                                                                                                                                                                                                                                                                                                                                                                                                                                                                                                                                                                                                                                                                                                                                                                                                                                                                                                                                                                                                                                                                                                                                                                                                                                                                                                                                                                                                                                                                                                                                                                                                                                                                                                                                                                                                                                                                                                                                                                                         |
|               |         | Cotton_D_gene_10028854, Cotton_D_gene_10022050, Cotton_D_gene_10012403, Cotton_D_gene_10026100, Cotton_D_gene_10024142                                                                                                                                                                                                                                                                                                                                                                                                                                                                                                                                                                                                                                                                                                                                                                                                                                                                                                                                                                                                                                                                                                                                                                                                                                                                                                                                                                                                                                                                                                                                                                                                                                                                                                                                                                                                                                                                                                                                                                                                                                                                                                                                                                                                                                                                                                                                                                                                                                                                                                                                                                                                                                                                         |
|               |         | Cotton_D_gene_10026137, Cotton_D_gene_10036714, Cotton_D_gene_10013795, Cotton_D_gene_10009122, Cotton_D_gene_10009122, Cotton_D_gene_10011063, Cotton_D_gene_10016627                                                                                                                                                                                                                                                                                                                                                                                                                                                                                                                                                                                                                                                                                                                                                                                                                                                                                                                                                                                                                                                                                                                                                                                                                                                                                                                                                                                                                                                                                                                                                                                                                                                                                                                                                                                                                                                                                                                                                                                                                                                                                                                                                                                                                                                                                                                                                                                                                                                                                                                                                                                                                         |
|               |         | Cotton_D_gene_10036186, Cotton_D_gene_10013933, Cotton_D_gene_10015879                                                                                                                                                                                                                                                                                                                                                                                                                                                                                                                                                                                                                                                                                                                                                                                                                                                                                                                                                                                                                                                                                                                                                                                                                                                                                                                                                                                                                                                                                                                                                                                                                                                                                                                                                                                                                                                                                                                                                                                                                                                                                                                                                                                                                                                                                                                                                                                                                                                                                                                                                                                                                                                                                                                         |
|               |         | Cotton_D_gene_10024886                                                                                                                                                                                                                                                                                                                                                                                                                                                                                                                                                                                                                                                                                                                                                                                                                                                                                                                                                                                                                                                                                                                                                                                                                                                                                                                                                                                                                                                                                                                                                                                                                                                                                                                                                                                                                                                                                                                                                                                                                                                                                                                                                                                                                                                                                                                                                                                                                                                                                                                                                                                                                                                                                                                                                                         |
|               |         | Cotton_D_gene_10032704, Cotton_D_gene_10013879                                                                                                                                                                                                                                                                                                                                                                                                                                                                                                                                                                                                                                                                                                                                                                                                                                                                                                                                                                                                                                                                                                                                                                                                                                                                                                                                                                                                                                                                                                                                                                                                                                                                                                                                                                                                                                                                                                                                                                                                                                                                                                                                                                                                                                                                                                                                                                                                                                                                                                                                                                                                                                                                                                                                                 |

**Table S6.** *Cont.*

| miRNA         | Targets |                                                |
|---------------|---------|------------------------------------------------|
|               | Number  | Gene ID                                        |
| novel_mir_372 | 2       | Cotton_D_gene_10039772, Cotton_D_gene_10007827 |
| novel_mir_374 | 1       | Cotton_D_gene_10029444                         |
| novel_mir_94  | 1       | Cotton_D_gene_10036376                         |

Note: Only genes with known or putative functions were presented.

**Table S8.** List of selected miRNAs and the corresponding primers used for real time RT-PCR analysis.

| No. | miRNA (sequence) | miR9-RT (5' → 3')       | miR-S (5' → 3')          |
|-----|------------------|-------------------------|--------------------------|
| 1   | miR5658 (UGUGAUG | CTCAACTGGTGTCTGGAGTC    | GGGTGTGATGA              |
|     | AUGAAGAUGGAA)    | GGCAATTCAGTTGAGTTCCATCT | TGAAGATGGAA              |
| 2   | miR159 (TTTGGATT | CTCAACTGGTGTCTGGAGTC    | GTTTGGATTGA              |
|     | GAAGGGAGCTCTA)   | GGCAATTCAGTTGAGTAGAGCTC | AGGGAGCTCTA              |
| 3   | miR172 (AGAATCTT | CTCAACTGGTGTCTGGAGTCG   | TGAGAATCTTG              |
|     | GATGATGCTGCAT)   | GCAATTCAGTTGAGATGCAGCA  | ATGATGCTGCAT             |
| 4   | Cotton 5S        | CCGACACTAATGCACCGGAT    | CGAGGACTTCC<br>CAGGAGGTC |
